# Supplementary material for: Meditation and Secondary Prevention of Depression and Anxiety in Heart Disease: a Systematic Review
Source: Springer Nature journal article supplement (doi:10.1007/s12671-018-0942-z), 2018-04-13
Supplement: MOESM1 [file 15656596]

**Supplementary Appendix S1: Search Strategy**

| 1: Heart/  2: heart*.mp.  3: angina.mp. or Angina Pectoris  4: coronary.mp. or Coronary Disease/  5: Myocardial Infarction/  6: Patients/  7: cardio* or MH Cardiovascular Diseases/  8. Heart Valve Diseases/ or valvular disease.mp.  9: cardiac.mp.  10: cardiovascular risk factors.mp.  11. Hypertension/ or hypertension.mp.  12: Myocardial Revascularization/ or revascularization.mp.  13: meditation.mp. or Meditation/  14: Relaxation Therapy/ or mindfulness based stress reduction.mp.  15: mindfulness.mp or Mindfulness/  16: guided imagery or “Imagery (Psychotherapy)”/  17: vipassana.mp.  18: zen.mp.  19: Breathing Exercises/ or pranayama.mp.  20: transcendental meditation.mp.  21: qigong.mp or Qigong/  22: depression  23: anxiety  24: 1 OR 2 OR 3 OR 4 OR 5 OR 6 OR 7 OR 8 OR 9 OR 10 OR 11 OR 12  25: 13 OR 14 OR 15 OR 16 OR 17 OR 18 OR 19 OR 20 OR 21  26: 22 OR 23  27: 24 AND 25 AND 26 |
| --- |
