# Supplementary material for: Meditation and Secondary Prevention of Depression and Anxiety in Heart Disease: a Systematic Review
Source: Springer Nature journal article supplement (doi:10.1007/s12671-018-0942-z), 2018-04-13
Supplement: MOESM2 [file 15656596]

| **Meditation elements** | **Non-significant** | | **Significant** | |
| --- | --- | --- | --- | --- |
| **depression** | **anxiety** | **depression** | **anxiety** |
| Concentrative meditation | (Paul-Labrador et al., 2006) (trait anxiety) | (Collins & Rice, 1997); (Paul-Labrador et al., 2006) (trait anxiety); (Luskin, Reitz, Newell, Quinn, & Haskell, 2002) | (Luskin et al., 2002) |  |
| Mindfulness based stress reduction (MBSR) | (Mandel, 2007) | (Mandel, 2007) (trait anxiety); (Salmoirago-Blotcher et al., 2013) | (Nyklíček, Dijksman, Lenders, Fonteijn, & Koolen, 2014; Parswani, Sharma, & Iyengar, 2013) | (Mandel, 2007) (state anxiety); (Nyklíček et al., 2014; Parswani et al., 2013) |
| Mindfulness | (Delaney, Barrere, & Helming, 2011) | (Delaney et al., 2011; Delui, Yari, Khouyinezhad, Amini, & Bayazi, 2013) | (Delui et al., 2013) |  |
| Home practice | (Delaney et al., 2011; Paul-Labrador et al., 2006) | (Mandel, 2007; Paul-Labrador et al., 2006) (trait anxiety); (Collins & Rice, 1997; Delaney et al., 2011; Luskin et al., 2002) | (Delui et al., 2013; Luskin et al., 2002; Nyklíček et al., 2014; Parswani et al., 2013) | (Nyklíček et al., 2014; Parswani et al., 2013); (Mandel, 2007) (state anxiety) |
| Diary/ log book re: home practice | (Delaney et al., 2011; Paul-Labrador et al., 2006) | (Mandel, 2007; Paul-Labrador et al., 2006) (trait anxiety); (Collins & Rice, 1997; Delaney et al., 2011; Luskin et al., 2002) | (Nyklíček et al., 2014; Parswani et al., 2013) | (Nyklíček et al., 2014; Parswani et al., 2013); (Mandel, 2007) (state anxiety) |
| Guided imagery peaceful scene | (Delaney et al., 2011) | (Collins & Rice, 1997; Delaney et al., 2011) (Mandel, 2007) (trait anxiety) |  | (Mandel, 2007) (state anxiety) |
| Guided imagery –suggested images | (Delaney et al., 2011) | (Delaney et al., 2011; Luskin et al., 2002); (Mandel, 2007) (trait anxiety); | (Luskin et al., 2002) | (Mandel, 2007) (state anxiety) |
| Guided imagery –health/heart imagery | (Delaney et al., 2011) | (Collins & Rice, 1997; Delaney et al., 2011; Luskin et al., 2002) | (Luskin et al., 2002) |  |
| Focused attention –body parts or body scan |  | (Salmoirago-Blotcher et al., 2013); (Mandel, 2007) (trait anxiety) | (Nyklíček et al., 2014; Parswani et al., 2013) | (Mandel, 2007) (state anxiety); (Nyklíček et al., 2014; Parswani et al., 2013) |
| Muscle relaxation |  | (Collins & Rice, 1997); (Mandel, 2007) (trait anxiety) |  | (Mandel, 2007) (state anxiety) |
| Controlled yoga breathing/ deep breathing |  | (Collins & Rice, 1997; Luskin et al., 2002); (Mandel, 2007) (trait anxiety) | (Luskin et al., 2002) | (Mandel, 2007) (state anxiety); |
| Focus on breathing | (Delaney et al., 2011) | (Delaney et al., 2011; Luskin et al., 2002; Salmoirago-Blotcher et al., 2013) | (Luskin et al., 2002; Parswani et al., 2013); | (Parswani et al., 2013) |
| Mantra/word repetition | (Paul-Labrador et al., 2006) | (Mandel, 2007; Paul-Labrador et al., 2006) (trait anxiety) |  | (Mandel, 2007) (state anxiety) |
| Psychoeducational sessions |  |  | (Luskin et al., 2002; Nyklíček et al., 2014) | (Nyklíček et al., 2014) |
| Other educational sessions | (Paul-Labrador et al., 2006) | (Collins & Rice, 1997); (Paul-Labrador et al., 2006) (trait anxiety) | (Parswani et al., 2013) | (Parswani et al., 2013) |
| Instruction sheet |  | (Mandel, 2007) (trait anxiety) |  | (Mandel, 2007) (state anxiety) |
| Introductory session –how to use the technique | (Paul-Labrador et al., 2006) | (Mandel, 2007; Paul-Labrador et al., 2006) (trait anxiety); (Collins & Rice, 1997; Luskin et al., 2002; Salmoirago-Blotcher et al., 2013). | (Luskin et al., 2002; Parswani et al., 2013) | (Parswani et al., 2013); (Mandel, 2007) (state anxiety); |
| Cognitive restructuring |  |  | (Nyklíček et al., 2014) | (Nyklíček et al., 2014) |
| Transcendental meditation | (Paul-Labrador et al., 2006) | (Paul-Labrador et al., 2006) (trait anxiety) |  |  |
| Group meetings | (Paul-Labrador et al., 2006) | (Paul-Labrador et al., 2006) (trait anxiety) (Delui et al., 2013; Luskin et al., 2002) | (Delui et al., 2013; Luskin et al., 2002; Nyklíček et al., 2014; Parswani et al., 2013) | (Nyklíček et al., 2014; Parswani et al., 2013) |
| Personal instruction (1:1) | (Delaney et al., 2011; Paul-Labrador et al., 2006) | (Delaney et al., 2011; Salmoirago-Blotcher et al., 2013); (Mandel, 2007; Paul-Labrador et al., 2006) (trait anxiety); (Collins & Rice, 1997) (state anxiety). | (Parswani et al., 2013) | (Parswani et al., 2013); (Mandel, 2007) (state anxiety) |
| Sitting meditation |  | (Salmoirago-Blotcher et al., 2013) | (Nyklíček et al., 2014; Parswani et al., 2013) | (Nyklíček et al., 2014; Parswani et al., 2013) |
| Audiotape/CD | (Delaney et al., 2011) | (Collins & Rice, 1997; Delaney et al., 2011; Delui et al., 2013; Salmoirago-Blotcher et al., 2013); (Mandel, 2007) (trait anxiety) | (Delui et al., 2013; Parswani et al., 2013) | (Parswani et al., 2013); (Mandel, 2007) (state anxiety) |
| Trained facilitator* | (Paul-Labrador et al., 2006) | (Luskin et al., 2002; Salmoirago-Blotcher et al., 2013); (Mandel, 2007; Paul-Labrador et al., 2006) (trait anxiety) | (Luskin et al., 2002; Nyklíček et al., 2014) | (Mandel, 2007) (state anxiety); (Nyklíček et al., 2014) |
| Phone delivered intervention |  | (Salmoirago-Blotcher et al., 2013) |  |  |
| Background music | (Delaney et al., 2011) | (Delaney et al., 2011); (Mandel, 2007) (trait anxiety) |  | (Mandel, 2007) (state anxiety) |

***trained and/or qualified in intervention delivery, and/or qualified health professional with extensive experience in the specific meditation technique**

Collins, J. A., & Rice, V. H. (1997). Effects of relaxation intervention in phase II cardiac rehabilitation: Replication and extension. *Heart and Lung: Journal of Acute and Critical Care, 26*(1), 31-44.

Delaney, C., Barrere, C., & Helming, M. (2011). The influence of a spirituality-based intervention on quality of life, depression, and anxiety in community-dwelling adults with cardiovascular disease: a pilot study. *Journal of Holistic Nursing, 29*(1), 21-32. doi:10.1177/0898010110378356

Delui, M. H., Yari, M., Khouyinezhad, G., Amini, M., & Bayazi, M. H. (2013). Comparison of cardiac rehabilitation programs combined with relaxation and meditation techniques on reduction of depression and anxiety of cardiovascular patients. *Open Cardiovascular Medicine Journal, 7*(1), 99-103.

Luskin, F., Reitz, M., Newell, K., Quinn, T. G., & Haskell, W. (2002). A controlled pilot study of stress management training of elderly patients with congestive heart failure. *Preventive Cardiology, 5*(4), 168-172+176.

Mandel, S. E. (2007). *Effects of music-assisted relaxation and imagery (MARI) on health-related outcomes in cardiac rehabilitation: Follow-up study.* Union Institute and University, Ann Arbor, MI. Retrieved from <https://search-proquest-com.ezproxy.lib.uts.edu.au/docview/304702330>

Nyklíček, I., Dijksman, S., Lenders, P., Fonteijn, W., & Koolen, J. (2014). A brief mindfulness based intervention for increase in emotional well-being and quality of life in percutaneous coronary intervention (PCI) patients: the MindfulHeart randomized controlled trial. *Journal of Behavioral Medicine, 37*(1), 135-144. doi:10.1007/s10865-012-9475-4

Parswani, M. J., Sharma, M. P., & Iyengar, S. S. (2013). Mindfulness-based stress reduction program in coronary heart disease: A randomized control trial. *International Journal of Yoga, 6*(2), 111-117. doi:10.4103/0973-6131.113405

Paul-Labrador, M., Polk, D., Dwyer, J. H., Velasquez, I., Nidich, S., Rainforth, M., . . . Merz, C. N. (2006). Effects of a randomized controlled trial of transcendental meditation on components of the metabolic syndrome in subjects with coronary heart disease. *Archives of Internal Medicine, 166*(11), 1218-1224. doi:10.1001/archinte.166.11.1218

Salmoirago-Blotcher, E., Crawford, S. L., Carmody, J., Rosenthal, L., Yeh, G., Stanley, M., . . . Ockene, I. S. (2013). Phone-delivered mindfulness training for patients with implantable cardioverter defibrillators: results of a pilot randomized controlled trial. *Annals of behavioral medicine : a publication of the Society of Behavioral Medicine, 46*(2), 243-250.
